# Supplementary material for: A Glimpse into the Role and Effectiveness of Splenectomy for Isolated Metachronous Spleen Metastasis of Colorectal Cancer Origin: Long-Term Survivals Can Be Achieved
Source: MDPI journal article supplement (doi:10.3390/jcm13082362), 2024-04-18
Supplement: s1 [file s1]

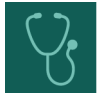

**Supplementary Table S1. Characteristics of 83 patients with splenectomies for metachronous isolated SM of CRC origin.**

| No | Year | Author, Reference                                                | Sex | Age | Primary tumor    | Interval (months) | Splenectomy | Number of SM | SM diameter, cm | Chemotherapy after SM resection | Survival (months) | Status                 |
|----|------|------------------------------------------------------------------|-----|-----|------------------|-------------------|-------------|--------------|-----------------|---------------------------------|-------------------|------------------------|
| 1  | 1965 | Miller [25]                                                      | m   | 65  | right colon      | 33                | Open        | 1            | 5               | NA                              | 18                | alive, no recurrence   |
| 2  | 1969 | Dunbar [26]                                                      | m   | 69  | rectum           | 48                | Open        | 1            | 18              | no                              | 84                | DOD                    |
| 3  | 1982 | Waller [27]                                                      | m   | 72  | sigmoid          | 48                | Open        | 1            | 9               | NA                              | 6                 | alive, with recurrence |
| 4  | 1986 | Slavin [28]                                                      | f   | 81  | right colon      | 30                | Open        | 1            | NA              | NA                              | 12                | alive, no recurrence   |
| 5  | 1992 | Capizzi [29]                                                     | f   | 51  | rectum           | 48                | Open        | 1            | 3.5             | no                              | 14                | alive, no recurrence   |
| 6  | 1993 | Thomas [30]                                                      | f   | 72  | sigmoid          | 132               | Open        | 1            | 3               | no                              | 66                | DOD                    |
| 7  | 1995 | Pedrazzoli [31]                                                  | m   | 65  | left colon       | 18                | Open        | 1            | 7               | no                              | 20                | alive, no recurrence   |
| 8  | 1997 | Mainprize [32]                                                   | f   | 62  | left colon       | 42                | Open        | 1            | NA              | NA                              | NA                | NA                     |
| 9  | 1997 | Ishida [33]                                                      | f   | 73  | colon (ns)       | NA                | Open        | NA           | NA              | NA                              | 72                | alive, no recurrence   |
| 10 |      |                                                                  | m   | 62  | colon (ns)       | NA                | Open        | NA           | NA              | NA                              | 24                | alive, no recurrence   |
| 11 |      |                                                                  | m   | 52  | colon (ns)       | 12                | Open        | NA           | NA              | NA                              | 6                 | alive, no recurrence   |
| 12 |      |                                                                  | m   | 48  | colon (ns)       | 24                | Open        | NA           | NA              | NA                              | 3                 | alive, no recurrence   |
| 13 | 1997 | Indudhara [34]                                                   | m   | 74  | sigmoid          | 24                | Open        | 1            | 9.5             | no                              | 12                | alive, no recurrence   |
| 14 | 1999 | Weathers [35]                                                    | f   | 33  | sigmoid          | 3                 | Open        | 1            | 3.5             | no                              | 12                | alive, no recurrence   |
| 15 | 1999 | Achuthan [36]                                                    | m   | 41  | rectum           | 12                | Open        | NA           | NA              | no                              | NA                | NA                     |
| 16 | 2000 | Kim [16]                                                         | m   | 65  | right colon      | 37                | Open        | 1            | 1               | no                              | 18                | alive, no recurrence   |
| 17 | 2000 | Fujita [17]                                                      | m   | 75  | right colon      | 20                | Open        | 1            | 9               | yes (ns)                        | 14                | alive, no recurrence   |
| 18 | 2000 | Lee [37]                                                         | f   | 66  | colon (ns)       | 108               | Open        | 1            | NA              | no                              | 5                 | alive, no recurrence   |
| 19 | 2001 | Place [38]                                                       | m   | 51  | sigmoid          | 72                | Open        | 1            | 13              | no                              | 6                 | alive, no recurrence   |
| 20 | 2001 | Okuyama [18]                                                     | m   | 62  | sigmoid          | 25                | Open        | 1            | 3               | no                              | 20                | alive, no recurrence   |
| 21 |      | Japanese literature cases reported by Okuyama (1987 - 1999) [18] | m   | 64  | right colon      | 3                 | Open        | 1            | NA              | NA                              | 2                 | alive, no recurrence   |
| 22 |      |                                                                  | f   | 61  | right colon      | 26                | Open        | NA           | NA              | NA                              | 15                | DOD                    |
| 23 |      |                                                                  | m   | 56  | transverse colon | 6                 | Open        | 1            | 6               | NA                              | 14                | DOD                    |
| 24 |      |                                                                  | m   | 74  | left colon       | 48                | Open        | 1            | 11.9            | NA                              | NA                | NA                     |

|    |      |                    |   |    |                    |     |      |   |     |          |    |                        |
|----|------|--------------------|---|----|--------------------|-----|------|---|-----|----------|----|------------------------|
| 25 |      |                    | m | 55 | transverse colon   | 42  | Open | 1 | NA  | NA       | NA | NA                     |
| 26 |      |                    | m | 80 | left colon         | 48  | Open | 1 | 4   | NA       | NA | NA                     |
| 27 |      |                    | f | 51 | sigmoid            | 12  | Open | 1 | 9   | NA       | 11 | alive, no recurrence   |
| 28 |      |                    | m | 65 | rectum             | 39  | Open | 1 | 11  | NA       | 41 | alive, no recurrence   |
| 29 |      |                    | f | 56 | right colon        | 10  | Open | 1 | 2   | NA       | 7  | alive, no recurrence   |
| 30 |      |                    | m | 74 | left colon         | 18  | Open | 1 | 1.5 | NA       | 12 | alive, no recurrence   |
| 31 |      |                    | f | 75 | left + right colon | 6   | Open | 2 | 3.6 | NA       | NA | NA                     |
| 32 |      |                    | m | 59 | left colon         | 24  | Open | 1 | 4.5 | NA       | 13 | alive, no recurrence   |
| 33 |      |                    | m | 58 | right colon        | 11  | Open | 1 | 9   | NA       | 12 | alive, no recurrence   |
| 34 |      |                    | m | 56 | right colon        | 7   | Open | 1 | 4.5 | NA       | 8  | DOD                    |
| 35 |      |                    | f | 60 | sigmoid            | 18  | Open | 1 | NA  | NA       | NA | NA                     |
| 36 |      |                    | f | 82 | sigmoid            | 24  | Open | 1 | 4   | NA       | 11 | DOD                    |
| 37 |      |                    | f | 56 | right colon        | 8   | Open | 1 | 4   | NA       | 13 | DOD                    |
| 38 |      |                    | f | 51 | sigmoid            | 48  | Open | 1 | 2   | NA       | 16 | alive, no recurrence   |
| 39 | 2003 | Genna [39]         | f | 73 | left colon         | 72  | Open | 1 | 6   | NA       | 36 | alive, no recurrence   |
| 40 | 2004 | Hashemzadeh [40]   | m | 44 | right colon        | 180 | Open | 1 | 14  | NA       | 4  | alive, no recurrence   |
| 41 | 2004 | Pizzirusso [41]    | m | 66 | left colon         | 5   | Open | 1 | NA  | yes (ns) | 12 | alive, no recurrence   |
| 42 | 2004 | Cavallaro [42]     | f | 55 | sigmoid            | 18  | Open | 1 | 3   | NA       | 12 | alive, no recurrence   |
| 43 | 2006 | Lobato [43]        | f | 57 | sigmoid            | 12  | Lap  | 2 | 4   | yes (ns) | 12 | alive, with recurrence |
| 44 | 2006 | Avninder [44]      | f | 52 | sigmoid            | 108 | Open | 1 | 13  | 5FU      | 22 | alive, no recurrence   |
| 45 | 2006 | Gencosmanoglu [45] | m | 76 | left colon         | 17  | Open | 1 | 6.5 | no       | 12 | alive, no recurrence   |
| 46 | 2008 | Popovic [46]       | m | 72 | rectum             | 18  | Open | 1 | 12  | NA       | NA | NA                     |
| 47 | 2008 | Bigot [47]         | f | 69 | left colon         | 24  | Open | 1 | 4   | no       | 60 | alive, no recurrence   |
| 48 | 2008 | Gasent Blesa [48]  | f | 52 | left colon         | 36  | Lap  | 1 | 4.5 | NA       | NA | NA                     |
| 49 | 2008 | Montemurro [49]    | f | 80 | right colon        | 31  | Open | 1 | 8   | TT       | 6  | alive, no recurrence   |
| 50 | 2009 | Sileri [50]        | m | 73 | right colon        | 63  | Open | 1 | 1.5 | no       | 40 | alive, no recurrence   |
| 51 | 2010 | Busic [51]         | m | 72 | left colon         | 24  | Open | 1 | 8   | no       | 12 | alive, no recurrence   |
| 52 | 2010 | Genc [52]          | m | 59 | right colon        | 15  | Open | 1 | 4   | no       | 24 | alive, no recurrence   |
| 53 | 2010 | Dogan [53]         | m | 58 | colon (ns)         | 20  | Open | 1 | 3.5 | FOLFOX   | 18 | alive, with recurrence |

|    |      |                     |   |    |             |    |      |    |     |              |    |                        |
|----|------|---------------------|---|----|-------------|----|------|----|-----|--------------|----|------------------------|
| 54 | 2011 | El M'rabet [54]     | m | 46 | right colon | 60 | Open | 2  | 2.8 | XELOX        | 36 | alive, no recurrence   |
| 55 | 2011 | Jain [55]           | f | 22 | rectum      | 15 | Lap  | 1  | 1   | FOLFIRI, TT  | 58 | alive, no recurrence   |
| 56 | 2011 | Gatenby [56]        | f | 72 | right colon | 34 | Open | NA | NA  | FOLFOX, TT   | 58 | alive, with recurrence |
| 57 |      |                     | f | 54 | right colon | 13 | Open | NA | NA  | 5FU          | 16 | DOD                    |
| 58 | 2011 | Pavlovic [57]       | m | 74 | right colon | 49 | Open | 1  | 7   | no           | 6  | alive, with recurrence |
| 59 | 2012 | Chekrine [58]       | m | 74 | left colon  | 60 | Open | 1  | 5   | no           | 7  | alive, with recurrence |
| 60 | 2013 | Takeuchi [59]       | m | 68 | right colon | 36 | Lap  | 1  | 2.5 | yes (ns)     | 36 | alive, no recurrence   |
| 61 | 2013 | Lopez Monclova [60] | m | 74 | colon (ns)  | NA | Lap  | 1  | NA  | NA           | 2  | alive, no recurrence   |
| 62 |      |                     | f | 60 | colon (ns)  | NA | Lap  | 1  | NA  | NA           | 2  | alive, no recurrence   |
| 63 | 2014 | Toyoshima [61]      | m | 79 | sigmoid     | 19 | Open | 1  | 1.8 | FOLFOX       | 12 | alive, no recurrence   |
| 64 | 2016 | Altat [20]          | m | 53 | sigmoid     | 12 | Open | 1  | 4.2 | yes (ns)     | 24 | DOD                    |
| 65 |      |                     | m | 59 | sigmoid     | 3  | Lap  | 1  | NA  | yes (ns)     | 12 | alive, with recurrence |
| 66 | 2016 | Badak [62]          | m | 68 | sigmoid     | 60 | Open | 1  | 3   | no           | 6  | alive, no recurrence   |
| 67 | 2016 | Efared [63]         | f | 59 | sigmoid     | 36 | Open | 2  | 6   | yes (ns)     | 10 | alive, no recurrence   |
| 68 | 2016 | Tartaro [64]        | f | 84 | right colon | 7  | Lap  | 1  | 8   | NA           | NA | NA                     |
| 69 | 2016 | Abdou [65]          | f | 64 | right colon | 16 | Lap  | 1  | 4.9 | 5FU, TT      | 12 | alive, no recurrence   |
| 70 | 2017 | Lucke-Wold [66]     | f | 53 | right colon | 12 | Open | 1  | 3.5 | no           | 36 | alive, no recurrence   |
| 71 | 2017 | Gilardi [67]        | f | 58 | left colon  | 18 | Lap  | 1  | NA  | NA           | NA | NA                     |
| 72 | 2017 | Rizzo [68]          | f | 76 | left colon  | 28 | Open | 1  | 1.6 | capecitabine | 21 | alive, no recurrence   |
| 73 | 2019 | Dimitrov [69]       | f | 43 | rectum      | 14 | Lap  | 1  | NA  | no           | 6  | alive, no recurrence   |
| 74 | 2019 | Kurumiya [21]       | f | 73 | right colon | 31 | Open | 1  | 3   | no           | 87 | alive, no recurrence   |
| 75 | 2019 | Miller-Ocuin [70]   | f | 59 | rectum      | 60 | Lap  | 1  | 5.8 | no           | 6  | alive, with recurrence |
| 76 | 2020 | Hu [71]             | f | 48 | sigmoid     | 21 | Lap  | mx | 3   | FOLFIRI, TT  | 7  | alive, no recurrence   |
| 77 | 2021 | Ognerubov [72]      | f | 68 | left colon  | 21 | Open | mx | 2.5 | XELOX        | 5  | alive, no recurrence   |
| 78 |      |                     | f | 70 | left colon  | 10 | Open | 1  | 2.5 | XELOX        | 26 | alive, no recurrence   |
| 79 | 2022 | Totikov [73]        | f | 62 | sigmoid     | 28 | Open | 1  | 16  | NA           | NA | NA                     |
| 80 | 2023 | Xu [74]             | m | 41 | rectum      | 60 | Lap  | 1  | 4.2 | FOLFIRI, TT  | 3  | alive, no recurrence   |
| 81 | 2023 | Chaudhary [75]      | m | 71 | sigmoid     | 24 | Lap  | 1  | 6.6 | yes (ns)     | 1  | alive, no recurrence   |
| 82 | 2023 | Ramos [76]          | f | 41 | right colon | 24 | Open | 1  | 6   | no           | NA | NA                     |

---

|    |      |           |   |    |        |     |      |   |     |    |   |                      |
|----|------|-----------|---|----|--------|-----|------|---|-----|----|---|----------------------|
| 83 | 2024 | Hong [77] | f | 67 | rectum | 136 | Open | 1 | 8.4 | no | 6 | alive, no recurrence |
|----|------|-----------|---|----|--------|-----|------|---|-----|----|---|----------------------|

---

SM – splenic metastasis; CRC – colorectal cancer; Lap – laparoscopic; mx – multiple metastases; TT – targeted therapy; DOD – died of disease; NA – not available data; ns – not specified.
